# Supplementary material for: NUV-pumped red-emitting Ca9MnK(PO4)7 phosphor: energy transfer and charge compensation
Source: Royal Society of Chemistry journal article supplement (doi:10.1039/d2dt01590k), 2022-01-01
Supplement: d2dt01590k1.pdf [file d2dt01590k1.pdf]

## Supporting Information

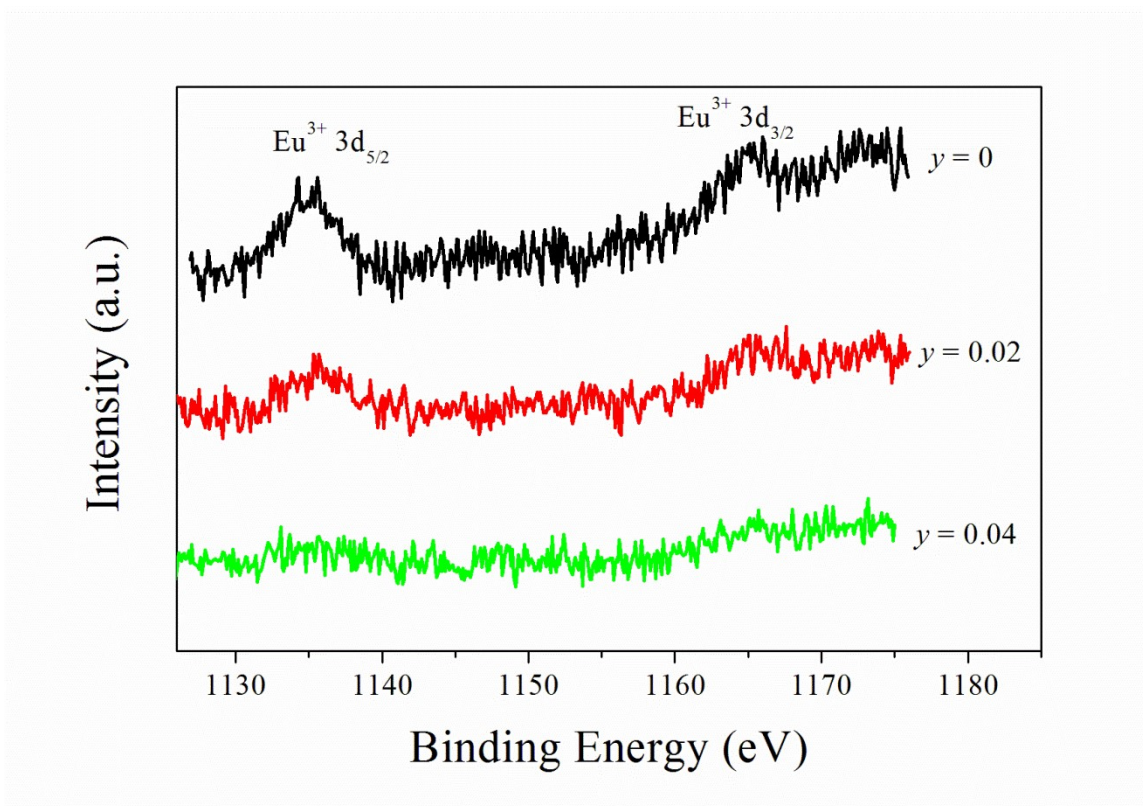

**Figure S1.** XPS spectra at the Eu 3d<sub>5</sub> position of CMKP:0.005Eu<sup>2+</sup>,yCe<sup>3+</sup> (y=0, 0.02, 0.04).

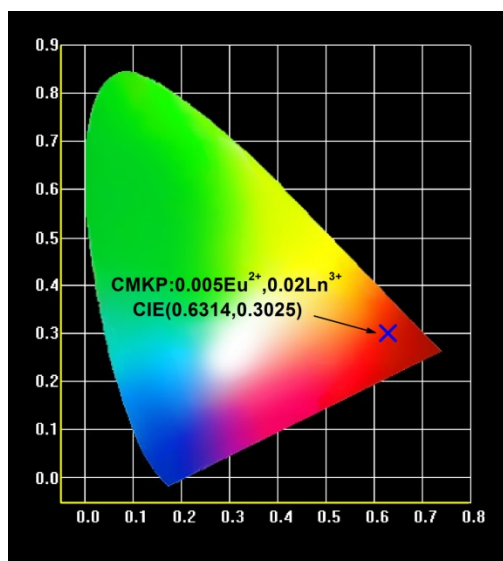

**Figure S2.** CIE chromaticity diagram corresponding to CMKP:Eu<sup>2+</sup>,Ln<sup>3+</sup>.
